# Supplementary material for: Nanoprodrug of retinoic acid-modified paclitaxel
Source: Royal Society of Chemistry journal article supplement (doi:10.1039/c7ob02553j), 2017-01-01
Supplement: c7ob02553j1.pdf [file c7ob02553j1.pdf]

## Supplementary Information

### **Nanoprodrug of retinoic acid-modified paclitaxel**

Zijun Zhou,<sup>a</sup> Jingzhe Yan,<sup>a</sup> Tingting Sun,<sup>\*b, c</sup> Xin Wang<sup>d</sup> and Zhigang Xie<sup>b</sup>

<sup>a</sup> Jilin Cancer Hospital, 1018 Huguang Street, Changchun, Jilin 130012, P. R. China

<sup>b</sup> State Key Laboratory of Polymer Physics and Chemistry, Changchun Institute of Applied Chemistry, Chinese Academy of Sciences, 5625 Renmin Street, Changchun, Jilin 130022, P. R. China.

<sup>c</sup> University of Chinese Academy of Sciences, Beijing 100049, P. R. China

<sup>d</sup> Department of Thyroid Surgery, The First Hospital of Jilin University, 71 Xinmin Street, Changchun, Jilin 130021, P. R. China

\* Corresponding author

E-mail: [suntt@ciac.ac.cn](mailto:suntt@ciac.ac.cn); Tel: +86-431-85262775

## **Contents:**

### **<sup>1</sup>H NMR data**

**Fig. S1** MALDI-TOF MS spectrum of RA-PTX.

**Fig. S2** Changes of the diameter and PDI of RA-PTX NPs incubated in PBS (pH 7.4) containing 10% FBS as a function of time measured by DLS.

**Fig. S3** Mass spectra of cell lysate of MCF-7 cells being incubated with RA-PTX NPs at 37 °C for 4 h.

### **<sup>1</sup>H NMR data**

<sup>1</sup>H NMR (400 MHz, CDCl<sub>3</sub>) δ 8.13 (d, J = 7.5 Hz, 2H), 7.81 - 7.33 (m, 13H), 7.15 - 7.01 (m, 1H), 6.97 (d, J = 8.3 Hz, 1H), 6.40 - 6.10 (m, 5H), 5.93 (s, 1H), 5.84 (s, 1H), 5.69 (d, J = 7.2 Hz, 1H), 5.54 (s, 1H), 4.98 (d, J = 9.2 Hz, 1H), 4.46 (s, 1H), 4.32 (d, J = 8.0 Hz, 1H), 4.20 (d, J = 7.7 Hz, 1H), 4.17 - 4.09 (m, 1H), 3.82 (d, J = 6.9 Hz, 1H), 2.93 (d, J = 30.5 Hz, 1H), 2.64 - 2.51 (m, 1H), 2.45 (d, J = 9.5 Hz, 3H), 2.40 - 2.28 (m, 3H), 2.23 (s, 3H), 2.00 (dd, J = 22.2, 9.8 Hz, 8H), 1.70 (d, J = 14.1 Hz, 6H), 1.31 - 1.20 (m, 10H), 1.14 (s, 4H), 1.03 (s, 6H).

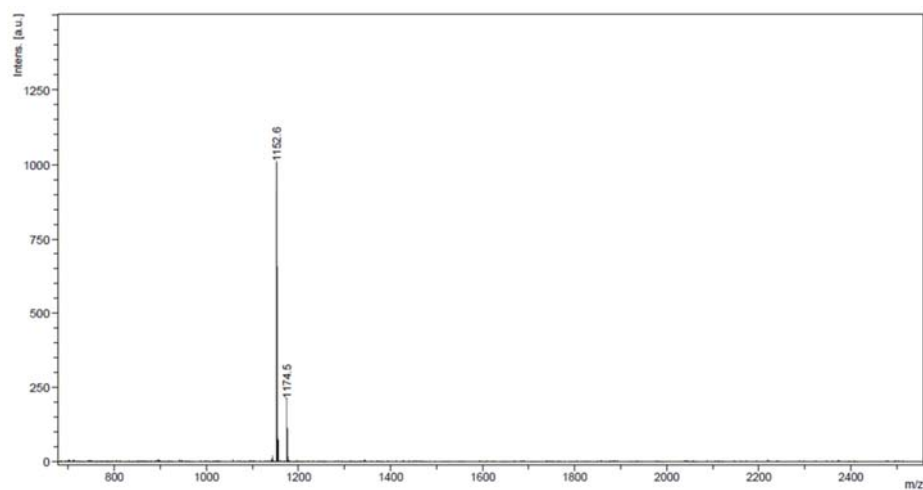

**Fig. S1** MALDI-TOF MS spectrum of RA-PTX.

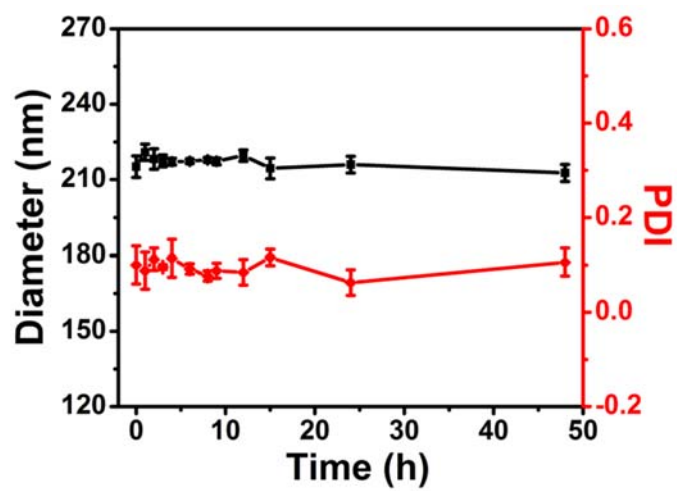

**Fig. S2** Changes of the diameter and PDI of RA-PTX NPs incubated in PBS (pH 7.4) containing 10% FBS as a function of time measured by DLS.

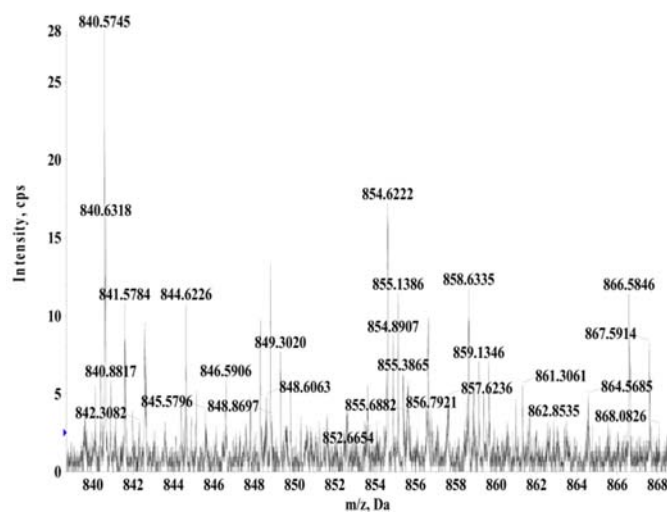

**Fig. S3** Mass spectra of cell lysate of MCF-7 cells being incubated with RA-PTX NPs at 37 °C for 4 h.
